# Supplementary material for: Tomato Domestication Affects Potential Functional Molecular Pathways of Root-Associated Soil Bacteria
Source: MDPI journal article supplement (doi:10.3390/plants10091942), 2021-09-17
Supplement: s1 [file s1]

Table S2: TN: Total Nitrogen (%), TOC: Total Organic Carbon (%), and elemental analysis of nutrients (ppm) in soil

|             |            |             |           |           |            |
|-------------|------------|-------------|-----------|-----------|------------|
| <b>TN</b>   | <b>TOC</b> | <b>Al</b>   | <b>As</b> | <b>Ca</b> | <b>Cd</b>  |
| 0.303±0.008 | 1.76±0.073 | 40938±1244  | 31±0.613  | 9226±230  | 2.22±0.022 |
| <b>Co</b>   | <b>Cr</b>  | <b>Cu</b>   | <b>Fe</b> | <b>K</b>  | <b>Li</b>  |
| 22±0.250    | 54±1.10    | 39±0.264    | 33233±298 | 10525±342 | 29±0.403   |
| <b>Mg</b>   | <b>Mn</b>  | <b>Na</b>   | <b>Ni</b> | <b>P</b>  | <b>Pb</b>  |
| 8086±78     | 875±20     | 0.046±0.002 | 46±0.884  | 995±41    | 24±0.585   |
| <b>S</b>    | <b>Si</b>  | <b>Sr</b>   | <b>Ti</b> | <b>V</b>  | <b>Zn</b>  |
| 432±11      | 3718±110   | 53±0.919    | 1326±27   | 69±1.62   | 102±3.37   |
